1  
2  
3  
4  
5  
6  
7  
8  
9  
10  
11  
12  
13  
14  
15  
16  
17  
18  
19  
20  
21  
22  
23  
24  
25  
26  
27  
28  
29  
30  
31  
32  
33  
34  
35  
36

**BPIFB3 facilitates flavivirus infection by controlling RETREG1-dependent  
reticulophagy**

Azia S. Evans<sup>1,2</sup>, Nicholas J. Lennemann<sup>1,2</sup>, Ka man Fan<sup>1,2,3</sup>, and Carolyn B. Coyne<sup>1,2\*</sup>

<sup>1</sup>Department of Pediatrics, University of Pittsburgh School of Medicine, <sup>2</sup>Center for Microbial Pathogenesis, Children’s Hospital of Pittsburgh of UPMC, Pittsburgh, PA 15219, <sup>3</sup>Tsinghua University School of Medicine, Beijing, China

Running title: BPIFB3 regulates reticulophagy

Author contributions:

Azia S. Evans: Conceptualization, Investigation, Visualization, Writing- original draft preparation, Writing- review and editing  
Nicholas J. Lennemann: Conceptualization, Methodology, Writing- review and editing  
Ka man Fan: Resources  
Carolyn B. Coyne: Conceptualization, Funding acquisition, Supervision, Visualization, Writing- review and editing

\*Address correspondence:

Carolyn Coyne, PhD  
9116 Rangos Research Center  
Children’s Hospital of Pittsburgh of UPMC  
One Children’s Hospital Way  
4401 Penn Avenue  
Pittsburgh, PA 15224  
Phone (412) 692-7519  
Email [coynec2@pitt.edu](mailto:coynec2@pitt.edu)

37 **Abstract**

38 The *flavivirus* genus, which includes dengue virus (DENV) and Zika virus (ZIKV), are significant  
39 human pathogens and the prevalence of infected vectors continues to geographically expand.  
40 Both DENV and ZIKV rely on expansion of the endoplasmic reticulum (ER) and the induction of  
41 autophagy to establish a productive viral infection. However, little is known regarding the interplay  
42 between the requirements for autophagy initiation during infection and the mechanisms used by  
43 these viruses to avoid clearance through the autophagic pathway. We recently showed that DENV  
44 and ZIKV inhibit reticulophagy (specific degradation of the ER through autophagy) by cleaving  
45 reticulophagy regulator 1 (RETREG1), an autophagy receptor responsible for targeted ER sheet  
46 degradation. These data suggest that DENV and ZIKV require specific autophagic pathways for  
47 their replication, while other autophagic pathways are antiviral. We previously identified BPI Fold  
48 Containing Family B Member 3 (BPIFB3) as a regulator of autophagy that negatively controls  
49 enterovirus replication. Here, we show that in contrast to enteroviruses, BPIFB3 functions as a  
50 positive regulator of DENV and ZIKV infection and that its RNAi-mediated silencing drastically  
51 inhibits the formation of viral replication organelles. We show that BPIFB3 depletion enhances  
52 ER fragmentation, while its overexpression protects against autophagy-induced ER degradation,  
53 demonstrating that BPIFB3 serves as a specific regulator of ER turnover. We further show that  
54 the antiviral effects of BPIFB3 depletion on flavivirus infection are reversed in RETREG1-depleted  
55 cells, and that BPIFB3 associates with RETREG1 within the ER, suggesting that BPIFB3  
56 regulates a RETREG1-specific reticulophagy pathway. Collectively, these studies identify BPIFB3  
57 as a regulator of the reticulophagy pathway and define the requirements for a novel host regulator  
58 of flavivirus infection.

59

60 **Author Summary**

61 Flaviviruses and other arthropod transmitted viruses represent a widespread global health  
62 problem with limited treatment options currently available. Thus, greater knowledge of the host

63 factors required for replication and transmission is needed to provide a better understanding of  
64 the cellular requirements for infection. Here, we show that the endoplasmic reticulum (ER)  
65 localized protein, BPIFB3 is required to facilitate flavivirus infection. Depletion of BPIFB3 in cells  
66 inhibits dengue virus and Zika virus infection prior to replication of the viral genome.  
67 Mechanistically, we show that BPIFB3 inhibits ER degradation in an autophagy-specific manner  
68 and that loss of BPIFB3 decreases the availability of ER membranes needed for flavivirus  
69 replication. We further show that BPIFB3 specifically regulates the RETREG1 pathway, but not  
70 other pathways of ER turnover. Together, our data define a previously uncharacterized method  
71 of regulating ER degradation and show that BPIFB3 is an essential host factor for a productive  
72 flavivirus infection.

73

## 74 **Introduction**

75 Flaviviruses, which include dengue virus (DENV) and Zika virus (ZIKV), are enveloped,  
76 positive-sense RNA viruses that replicate exclusively within endoplasmic reticulum (ER)  
77 membranes (1,2). Upon entry and uncoating, the flaviviral genome is directly translated as a  
78 single polyprotein and embedded in the ER, which induces ER expansion and the formation of  
79 viral replication organelles (3–6). Like other RNA viruses, flaviviruses sequester their replication  
80 machinery within membrane bound compartments that provide a high concentration of host and  
81 viral replication factors, while isolating viral replication intermediates from detection by the host  
82 innate immune system (7,8).

83 The success of flavivirus replication is closely linked to the availability of ER membranes.  
84 The ER is an expansive network of membranous sheets and tubules that originate at the nuclear  
85 envelope and extend to the cell periphery (9). ER sheets are distributed perinuclearly and function  
86 as the primary location of protein synthesis, while ER tubules extend to the plasma membrane  
87 and play a prominent role in lipid synthesis and communication with other organelles (10). Both  
88 DENV and ZIKV utilize rough ER as the primary source of membranes for the formation of

89 replication organelles, while smooth ER is used in the formation of convoluted membranes during  
90 viral replication (7). These convoluted membranous formations are found in close proximity to  
91 replication complexes and mitochondria, suggesting a role in lipid synthesis and/or membrane  
92 expansion during infection (8).

93         Although autophagy commonly serves as a proviral pathway for RNA viruses, these  
94 viruses often avoid clearance by flux through the autophagic pathway, which can function in an  
95 antiviral manner (11). In the absence of infection, macroautophagy, hereafter referred to as  
96 autophagy, functions to degrade bulk cytoplasmic contents and excess or damaged organelles  
97 by fusion with the lysosome, which is referred to as autophagic flux (12,13). During infection,  
98 autophagy functions as an innate defense pathway to facilitate the clearance of viral complexes  
99 and infectious particles (14–16). Furthermore, recent evidence suggests that autophagy can be  
100 specifically activated through innate immune signaling to induce the clearance of intracellular  
101 pathogens (17). To overcome autophagy-mediated clearance, many viruses have developed  
102 strategies to either inhibit flux through the autophagic pathway or to utilize it in a proviral manner  
103 for virion maturation and release (14). However, the full relationship between flaviviruses and  
104 autophagy remains unclear. Evidence suggests that DENV and ZIKV induce autophagy as a  
105 mechanism to promote viral infection (18,19). Specifically, DENV infection promotes the  
106 degradation of lipid droplets by autophagy, termed lipophagy, to allow for an increased energy  
107 supply during infection (20,21). In contrast, we have previously demonstrated that degradation of  
108 the ER through selective autophagy (reticulophagy) restricts flavivirus replication due to the  
109 dependence of viral replication on ER membranes (22). Furthermore, DENV and ZIKV specifically  
110 inhibit reticulophagy by cleaving reticulophagy regulator 1 (RETREG1), which is necessary for  
111 targeted ER sheet degradation (22). These studies collectively suggest that specific autophagic  
112 pathways may be anti-flaviviral, while others are pro-flaviviral.

113         We previously identified bactericidal/permeability increasing protein (BPI) fold containing  
114 family B member 3 (BPIFB3) as an ER-localized antiviral regulator of coxsackievirus B (CVB)



115 infection, a positive-sense RNA virus belonging to the *Enterovirus* genus, through its negative  
116 regulation of a non-canonical form of autophagy (23). Similar to flaviviruses, CVB relies on the  
117 availability of intracellular membranes to establish replication compartments; however, the source  
118 of these cellular membranes is variable. In this study, we identified BPIFB3 as a positive regulator  
119 for flavivirus infection. Mechanistically, we show that BPIFB3 functions upstream of RETREG1 to  
120 specifically control reticulophagy, thereby controlling the availability of ER membranes for viral  
121 replication. Our study therefore defines a specific role for BPIFB3 in reticulophagy and suggests  
122 that it differentially controls enterovirus and flavivirus replication.

123

## 124 **Results**

### 125 **BPIFB3 is required for DENV and ZIKV infection**

126 We have previously shown that BPIFB3 is an ER-localized negative regulator of CVB infection  
127 (23). Given that flaviviruses replicate exclusively on membranes derived from the ER, we  
128 determined whether BPIFB3 also functions to regulate DENV and ZIKV replication. To do this,  
129 human brain microvascular endothelial cells (HBMEC) were transfected with either a siRNA  
130 targeting BPIFB3 (BPIFB3si) or a control siRNA (CONsi) and infected with DENV, ZIKV, or CVB  
131 (23). In contrast to the significant enhancement of CVB infection, RNAi-mediated silencing of  
132 BPIFB3 resulted in an approximately 90% decrease in the replication of both DENV and ZIKV, as  
133 assessed by RT-qPCR and immunofluorescence microscopy for the production of double-  
134 stranded RNA, a replication intermediate (**Figure 1a, d, S1d**), and a 100-fold decrease in  
135 infectious particle production (**Figure 1b**). This phenotype was specific for BPIFB3 and other  
136 members of the BPIFB family (BPIFB2 and BPIFB6) did not affect DENV and ZIKV uniformly  
137 (**Figure S1a, b**). Depletion of BPIFB3 was confirmed by RT-qPCR (**Figure S1c**). To determine at  
138 which stage of the flaviviral life cycle BPIFB3 depletion impairs, we used HBMEC stably  
139 propagating a DENV subgenomic replicon (HBMEC<sup>rep</sup>) (24). DENV replicon cells express the full  
140 seven nonstructural proteins that allows for replication of replicon RNA as well as the remodeling

141 of ER membranes, including the formation of replication organelles, similar to viral infection (25).  
142 Silencing of BPIFB3 in HBMEC<sup>rep</sup> had no effect on replicon RNA levels (**Figure 1c**), suggesting  
143 the defect in flavivirus infection occurs prior to the formation of viral replication organelles within  
144 the ER.

145 To characterize the effects of BPIFB3 depletion on DENV and ZIKV infection, we  
146 performed transmission electron microscopy (TEM) on DENV- and ZIKV-infected HBMEC  
147 transfected with CONsi or BPIFB3si. We found that BPIFB3si prevented the formation of both  
148 DENV and ZIKV membrane bound viral replication organelles (**Figure 1e**). Quantification of ZIKV  
149 replication organelles (defined as ER associated, membrane bound vesicles of approximately 70-  
150 100 nm) confirmed that BPIFB3 silencing inhibited flavivirus infection prior to genome replication  
151 (**Figure 1f**). In addition to defects in replication organelle formation, we did not observe the  
152 formation of convoluted membranes or ER rearrangement characteristic of flavivirus infection in  
153 BPIFB3-depleted cells, suggesting BPIFB3si inhibits infection early during the viral lifecycle.

154

### 155 **Infection of BPIFB3 depleted cells induces aberrant ER structures**

156 We showed previously that BPIFB3 localizes to domains enriched for the ER sheet marker  
157 CLIMP63 (26). Therefore, we sought to examine whether BPIFB3 is involved in regulating ER  
158 morphology or turnover during flavivirus infection. In uninfected cells, ER sheets originate at the  
159 nuclear envelope and extend to the cell periphery in a fairly uniform arrangement; however, during  
160 infection with DENV and ZIKV, ER sheets (marked by CLIMP63) condense around the perimeter  
161 of the nucleus where they co-localize with viral double stranded RNA (dsRNA), designating the  
162 location of viral membrane remodeling and replication organelle formation (22). In some cases,  
163 cells depleted of BPIFB3 exhibited low levels of viral replication (as determined by dsRNA  
164 immunofluorescence); however, these cells exhibited an abnormal rearrangement of CLIMP63-  
165 positive ER domains into punctate structures (**Figure 2a**). The ability to establish infection in  
166 select BPIFB3si cells may be caused by variations in knockdown efficiency across individual cells,

167 or could indicate that in some cases, low levels of replication can be initiated in cells depleted of  
168 BPIFB3. TEM analysis of BPIFB3 depleted cells infected with ZIKV exhibited dramatic expansions  
169 of ER membranes with no evidence of replication organelles (**Figure 2b**). Importantly, uninfected  
170 BPIFB3si transfected cells did not exhibit aberrant ER structures and contained few identifiable  
171 ER membranes; suggesting that ZIKV may be able to infect BPIFB3 depleted cells and induce  
172 early ER remodeling but is unable to readily form replication organelles or establish efficient  
173 replication.

174

### 175 **BPIFB3 regulates ER sheet morphology in response to autophagy induction**

176 We previously demonstrated that BPIFB3 serves as a regulator of a non-canonical form of  
177 autophagy, however the precise mechanism of regulation remained unclear (23). To assess the  
178 impact of BPIFB3 silencing on host cell pathways, we performed whole transcriptome RNAseq  
179 studies on uninfected and infected HBMEC transfected with CONsi or BPIFB3si. Differential  
180 expression analysis identified numerous autophagy related genes as dysregulated in BPIFB3si  
181 samples compared to controls (**Figure 3a**). These included ATG101, WIPI3, ATG3, ATG12, and  
182 LC3B which were transcriptionally upregulated in BPIFB3 depleted cells and are involved in  
183 autophagosome formation prior to vesicle release and maturation (12). Interestingly, WIPI2,  
184 BECN1, ATG10, and ATG7 were downregulated in BPIFB3si cells despite their function during  
185 autophagosome formation in conjunction with the upregulated genes mentioned above. These  
186 results further suggested that BPIFB3 is involved in regulating a non-canonical form of autophagy.  
187 Importantly, our transcriptional analyses did not reveal an increase in interferons (IFNs) or  
188 interferon stimulated gene (ISG) production in uninfected or infected samples, confirming that the  
189 decrease in infection observed in BPIFB3 depleted cells is not the result of increased innate  
190 immune activation or signaling. We also examined the expression levels of ER structural  
191 transcripts and found that the ER sheet marker CLIMP63 (also named CKAP4) was upregulated  
192 in uninfected BPIFB3si samples, while the ER tubule protein reticulon3 (RTN3) was

193 downregulated. These transcriptional changes may suggest a need for increased ER sheet  
194 production in response to BPIFB3 silencing.

195         Given that we observed an enhancement in ER-enriched punctae in DENV and ZIKV  
196 infected BPIFB3si cells (**Figure 2a**), we next determined whether BPIFB3 enhanced ER  
197 degradation through autophagy. To do this, we examined ER sheet morphology by  
198 immunofluorescence under both nutrient rich (fed) or serum starved conditions, which induces  
199 autophagy. We found that serum starvation of cells depleted of BPIFB3 induced the formation of  
200 CLIMP63 puncta that were absent in CONsi transfected cells (**Figure 3b**). To determine if this  
201 was unique to ER sheets, or if BPIFB3si also influenced the rearrangement of ER tubules, we  
202 analyzed the localization of the tubule specific protein reticulon4 (RTN4). Serum starvation  
203 induced the rearrangement of RTN4 positive ER tubules, however this phenotype was also  
204 observed in CONsi cells, and was not further exaggerated by BPIFB3 depletion (**Figure S2**).

205         To determine if ectopic expression of BPIFB3 exerted an opposing phenotype leading to  
206 the stabilization of ER sheets, we transfected human osteosarcoma U2OS cells with V5 fused  
207 BPIFB3 (BPIFB3-V5) and transferred them to either nutrient rich media (fed) or HBSS (serum  
208 starved) 48 hours post transfection. Using quantitative image analysis, we found that the levels  
209 of endogenous CLIMP63 were significantly higher in cells overexpressing BPIFB3 under both  
210 conditions (**Figure 3c, 3d**). These data suggest that BPIFB3 expression protects ER sheets from  
211 degradation through autophagy, and that loss of BPIFB3 leads to enhanced ER turnover.

212

### 213 **RETREG1 and BPIFB3 localize in close proximity within the ER**

214         Given our data indicating BPIFB3 stabilizes ER sheets, we sought to determine whether BPIFB3  
215 regulates the reticulophagy pathway. We first analyzed whether BPIFB3 localizes with RETREG1,  
216 which we showed previously functions as an antiviral regulator of flavivirus infection (22). We  
217 found that ectopically expressed BPIFB3 colocalized with both wild-type RETREG-1 and an  
218 autophagy deficient mutant of RETREG1 lacking an LC3 interacting region (LIR) (mutLIR),

219 suggesting that BPIFB3 and RETREG1 colocalize independent of the ability of RETREG-1 to  
220 function in reticulophagy (**Figure 4a**). To assess if co-localization was due to a direct interaction  
221 we performed co-immunoprecipitation experiments, however we were unable to observe an  
222 interaction between BPIFB3 and RETREG1 due to low protein solubility.

223 To determine whether BPIFB3 and RETREG1 reside in close proximity to one another,  
224 we used a modified reversible bimolecular fluorescence complementation (BiFC) assay. This  
225 assay utilizes GFP broken into two distinct fragments, a large portion composed of the first ten  $\beta$   
226 sheets of GFP (GFP1-10) and a smaller fragment composed of the eleventh  $\beta$  sheet (GFP11)  
227 (27). When the tagged proteins do not interact or associate within the same complex, the GFP  
228 fragments are too far apart and there is no fluorescence. However, if there is either a direct or  
229 indirect association (of less than 10nm apart), GFP folds correctly and fluoresces similar to full  
230 length GFP (28) (schematic, **Figure 4b**). We fused RETREG1 with GFP1-10 and BPIFB3 with  
231 the smaller GFP11. U2OS cells were transfected with each split GFP construct and with either  
232 mCherry fused CLIMP63 or RFP fused LC3. We found that RETREG1 GFP1-10 and BPIFB3  
233 GFP11 localized in very close proximity (<10nm) to one another, as determined by positive GFP  
234 fluorescence in cotransfected cells, however no green fluorescence was observed when  
235 RETREG1 GFP1-10 was expressed with GFP11 alone (**Figure S3**). We further found that BiFC-  
236 component BPIFB3 and RETREG1 co-localized with the ER sheet marker CLIMP63, but not the  
237 autophagosome marker LC3 (**Figure 4c**). These data suggest that BPIFB3 and RETREG1  
238 localize to ER sheets and are in close proximity, but may not form a direct interaction. Further, we  
239 did not observe RETREG1 colocalization with LC3B upon expression of BPIFB3, thus BPIFB3  
240 may restrict RETREG1-mediated reticulophagy.

241

242 **BPIFB3 negatively regulates RETREG1-mediated reticulophagy**

243 To determine whether silencing of BPIFB3 enhances reticulophagy, we first analyzed ER  
244 morphology and autophagosome accumulation by TEM in cells co-depleted of BPIFB3 and  
245 RETREG1. We previously showed that BPIFB3 silencing leads to an accumulation of  
246 autophagosomes, lysosomes, and amphisomes (23). However, this phenotype was completely  
247 reversed in cells transfected with RETREG1si (**Figure 4d, 4e**), suggesting that this induction  
248 occurs downstream of RETREG-1-mediated reticulophagy.

249 In response to autophagy induction, RETREG1 interacts with LC3 to target ER  
250 membranes to the autophagosome for eventual degradation by the lysosome (13). Given that  
251 BPIFB3 expression led to increased levels of ER sheets and that silencing of RETREG1 reversed  
252 the induction of autophagy in cells transfected with BPIFB3si, our data suggested that BPIFB3  
253 inhibits RETREG1-mediated reticulophagy. To confirm this, we transfected U2OS cells with  
254 RETREG1-GFP and LC3-RFP in the presence or absence of BPIFB3 under nutrient rich or  
255 nutrient deprived conditions. We found no differences in the numbers of RETREG1 positive  
256 puncta alone (**Figure 5b**) or in the co-localization of RETREG1 and LC3 puncta (**Figure 5c**) under  
257 nutrient rich conditions. However, in response to nutrient deprivation, we found that BPIFB3  
258 expression significantly reduced the number of RETREG1 positive puncta (**Figure 5b**) and  
259 prevented the co-localization of RETREG1 with LC3 (**Figure 5c**). Collectively, these data suggest  
260 that BPIFB3 functions as a negative regulator of RETREG1-mediated reticulophagy.

261

### 262 **BPIFB3 facilitates flavivirus replication by negatively regulating reticulophagy**

263 DENV and ZIKV are dependent on the availability of ER membranes to replicate and  
264 reticulophagy thus functions as an antiviral pathway that limits the availability of these membranes  
265 (22). To determine if the reduction of flavivirus replication in cells depleted of BPIFB3 resulted  
266 from enhanced reticulophagy, we co-depleted BPIFB3 and RETREG1 in cell and infected with  
267 DENV or ZIKV. We found that silencing of RETREG1 completely reversed the inhibition of  
268 flavivirus infection in cells silenced for BPIFB3 expression, as determined by both qPCR for vRNA

269 and FFU for viral titers (**Figure 6a, 6b**). Consistent with our previous work (22), silencing of  
270 RETREG1 enhanced flavivirus replication, which was unaffected by BPIFB3 silencing. Moreover,  
271 we found that co-depletion of BPIFB3 and RETREG1 also reversed the proviral impact of BPIFB3  
272 silencing on CVB replication (**Figure 6c**). Depletion of BPIFB3 and RETREG1 was confirmed by  
273 RT-qPCR (**Figure S4**). Interestingly, we found that BPIFB3 specifically regulates RETREG1-  
274 mediated ER sheet reticulophagy as the anti-flaviviral effect of BPIFB3 silencing was unaffected  
275 by silencing of either reticulon 3 (RTN3), the ER tubule specific reticulophagy receptor, or the ER  
276 stress-specific reticulophagy receptor Sec62 (**Figure S5**). Lastly, we found that BPIFB3 localizes  
277 to the same ER domains as flaviviral nonstructural proteins during active replication, as  
278 determined by the colocalization of DENV NS1, NS3 and ZIKV NS4B which localize to replication  
279 organelles during infection (**Figure 6d**). These data implicate BPIFB3 as a specific negative  
280 regulator of RETREG1-mediated reticulophagy, which functions to promote flaviviral replication.

281

## 282 **Discussion**

283 The success of flavivirus infection depends on the cooperation of numerous cellular  
284 organelles and pathways that function to produce progeny virions, specifically relying on host  
285 membranes throughout their lifecycles. Here we show that BPIFB3 is required for DENV and ZIKV  
286 infection by regulating the availability of ER membranes for viral remodeling. Our data show that  
287 BPIFB3 depletion enhances ER sheet reticulophagy in response to viral infection and the  
288 induction of autophagy. Furthermore, we demonstrate BPIFB3 functions to regulate RETREG1  
289 targeted reticulophagy and not RTN3 or Sec62 specific pathways. These findings thus not only  
290 define the role of specific autophagic pathways in the regulation of flavivirus infection, but also  
291 identify BPIFB3 as a novel regulator of RETREG1-specific forms of reticulophagy.

292 Unlike other RNA viruses, flaviviruses depend solely on ER-derived membranes for their  
293 replication. The viral genome is delivered to the rough ER following entry and uncoating, where  
294 translation of viral proteins induces expansion of the ER. Of the seven nonstructural proteins, the



295 majority remain associated with the ER throughout the lifecycle, where they function in viral  
296 replication, membrane remodeling, and inactivation of reticulophagy and ER stress pathways (5–  
297 7,22,29,30). While it has been suggested that the virally-encoded non-structural proteins NS1,  
298 NS4A, and NS4B are involved in membrane manipulation during DENV infection, little is known  
299 regarding host factors essential for this process. Currently, only three host factors have been  
300 implicated in membrane expansion, including fatty acid synthase, RETREG1, and reticulon 3.1A  
301 (RTN3.1A). FASN is recruited to sites of replication organelle formation by the DENV protease  
302 NS3, suggesting increased lipid synthesis is important for membrane remodeling (20).  
303 Additionally, both DENV and ZIKV inhibit ER degradation by cleaving the RETREG1  
304 reticulophagy receptor, allowing for an accumulation of ER membranes (22). Lastly, RTN3.1A  
305 localizes to viral replication organelles to facilitate proper membrane curvature, however it does  
306 not interact with DENV or ZIKV NS4a during membrane remodeling (31). Our work presented  
307 here further confirms that degradation of the ER is an antiviral process and defines a new  
308 mechanism used by flaviviruses to regulate ER turnover. RNAi mediated silencing of BPIFB3  
309 leads to enhanced levels of reticulophagy, which decreases the availability of ER membranes for  
310 flavivirus replication. Concurrent depletion of RETREG1 with BPIFB3 overcomes this defect,  
311 demonstrating that the antiviral effects of BPIFB3 depletion are specific to RETREG1-mediated  
312 reticulophagy and inhibition of this pathway restores viral replication. These data imply that the  
313 manipulation of BPIFB3 protein levels during flavivirus infection could alter reticulophagy levels  
314 to either enhance viral replication or allow for the host cell to overcome infection at an early stage.

315 One method proposed to promote membrane expansion during flavivirus infection is the  
316 induction of autophagy (30). However, our data demonstrate that enhanced levels of  
317 reticulophagy, particularly early during infection, inhibits membrane remodeling and replication  
318 organelle formation. Recent work has identified a number of ER-specific autophagy pathways that  
319 differ by the receptor used to target cargo to autophagosomes (13,32,33). However, it remains  
320 unclear whether these pathways are regulated by the same machinery that controls canonical



321 macroautophagy. The growing diversity in the various forms of autophagy further complicates our  
322 understanding of the relationship between viral infection and this pathway, as certain forms of  
323 autophagy may differentially regulate viral replication at various stages of the viral life cycle. The  
324 work presented here, in combination with our previous work characterizing BPIFB3 as a negative  
325 regulator of CVB infection, demonstrates the unique requirements for autophagy between  
326 different RNA virus families. In contrast to the unclear role for distinct autophagic pathways in  
327 flavivirus infection, CVB benefits from autophagy induction, as it uses autophagosomes and other  
328 cytoplasmic vesicles for replication organelle formation. Importantly, CVB inhibits fusion of the  
329 autophagosome with the lysosome, which enhances the number of cytoplasmic vesicles and  
330 prevents the degradation of viral replication machinery (34–36). Conversely, it has not been  
331 demonstrated whether flaviviruses have developed strategies to avoid clearance through the  
332 macroautophagy pathway similar to CVB and other enteroviruses. While the induction of  
333 autophagy during flavivirus infection has been implicated in enhancing viral replication (37), the  
334 precise timing of induction may have distinct effects on the viral lifecycle. Furthermore, the ability  
335 to specifically activate one form of autophagy while inhibiting others may be essential for  
336 successful flavivirus infection. The distinction between membrane manipulation during CVB  
337 infection and flavivirus infection explains the differential effects of BPIFB3 in regulating these  
338 unique viruses and further suggests that increased flux through autophagy is detrimental to  
339 flavivirus replication.

340         The BPIFB family of proteins were initially named and identified because of their homology  
341 to the bactericidal/permeability-increasing (BPI) protein; a secreted antimicrobial protein that  
342 functions through binding to LPS (38–40). Despite the high degree of predicted structural  
343 homology, BPIFB3 localizes to the ER and is not secreted (23). Of the other members of the  
344 family, BPIFB2 and BPIFB6 are also ER localized, however neither appear to regulate autophagy  
345 (26) or flavivirus infection. BPIFB proteins contain two BPI folds demonstrated to have lipid  
346 binding properties. Unlike other BPIFB proteins, the first BPI domain (BPI1) of BPIFB3 lacks the

347 ability to bind lipids, while BPI2 is capable of binding phosphatidic acid, phosphatidylserine,  
348 cardiolipin, and other lipid molecules (26). Of the related proteins, BPIFB6 is the only protein to  
349 be characterized, and has been demonstrated to regulate secretory trafficking and Golgi  
350 morphology (26). Together with the data presented here, this suggests that a possible unifying  
351 function of these proteins is to regulate sites of vesicle trafficking. Here we show BPIFB3 over  
352 expression decreases the amount of ER specific autophagosomes in a cell, while depletion  
353 enhances reticulophagy. In comparison, BPIFB6 depletion results in Golgi dispersal and a  
354 disruption of retrograde and anterograde trafficking (26). This alludes to a possible mechanism  
355 where BPIFB3 and BPIFB6 expression is associated with decreased vesicle trafficking to the  
356 autophagic and secretory pathways respectively, while loss of expression leads to enhanced  
357 vesicle trafficking originating in the ER. Importantly, expression of BPIFB3 is remarkably low, and  
358 we are unable to detect endogenous protein by either western or immunofluorescence. Despite  
359 its low expression, depletion of BPIFB3 elicits a dramatic phenotype in cells, suggesting an  
360 essential role in regulating morphology of the cellular membrane network. This is consistent with  
361 other ER structural proteins that drastically effect membrane morphology at very low levels of  
362 endogenous expression (41). Their potential roles in vesicle trafficking has important implications  
363 for the ability of these proteins to impact the trafficking and spread of a variety of viruses. However,  
364 further characterization is required to delineate the different methods by which viruses are  
365 trafficked during infection.

366         The relationship between flavivirus infection and the autophagic pathway is likely to be  
367 complex. While the initiation of autophagy and lipophagy have been demonstrated as proviral  
368 pathways (19,21,30,37), flux through the autophagic pathway and reticulophagy are antiviral  
369 (18,22,42). Thus, further characterization of the role of specific autophagic pathways in the  
370 regulation of flavivirus infection is needed to understand and develop new mechanisms to control  
371 infection.

372

## 373 **Methods**

### 374 **Cells and viruses**

375 Human brain microvascular endothelial cells (HBMEC) were maintained in in RPMI 1640  
376 supplemented with 10% fetal bovine serum (FBS), 10% NuSerum, 1x non-essential amino acids,  
377 1x minimum essential medium vitamins, 1% sodium pyruvate, and 1% antibiotic. Human bone  
378 osteosarcoma U2OS and Vero cells were grown in DMEM with 10% FBS and 1% antibiotic.  
379 Development of DENV replicon HBMECs using constructs provided by Theodore Pierson  
380 (NIH/NIAID) was described previously(24). *Aedes albopictus* midgut C6/36 cells were cultured in  
381 DMEM supplemented with 10% FBS and 1% antibiotic at 28°C in a 5% CO<sub>2</sub> atmosphere.

382 DENV2 16881 and ZIKV Paraiba/2015 (provided by David Watkins, University of Miami)  
383 were propagated in C6/36 or Vero cells, respectively(43). Titers were determined by fluorescent  
384 focus assay as previously described, using recombinant anti-double-stranded RNA monoclonal  
385 antibody (provided by Abraham Brass, University of Massachusetts)(44). Propagation and  
386 titration have been describe previously of CVB3 (RD) has been described previously(45).  
387 Experiments measuring infection levels were performed using a multiplicity of infection (MOI) of  
388 1 for 16 hours (CVB) or 48 hours (DENV and ZIKV), and infection was quantified by RT-qPCR or  
389 fluorescent focus assay.

390

### 391 **siRNAs, plasmids and transfections**

392 Characterization of siRNAs targeting BPIFB3, BPIFB2, BPIFB6, and RETREG1 (FAM134B) have  
393 been described previously(22,23). Sequences of siRNAs targeting RTN3 or Sec62 are, RTN3:  
394 CCACUCAGUCCCAUCCAUtt, and Sec62: GAAGGAUGAGAAAUCUGAAtt. All siRNAs,  
395 including the scrambled control (CONsi), were purchased from Sigma. Efficiency of knockdown  
396 was determined by RT-qPCR for each siRNA target. siRNAs were reverse transfected at 25 nM  
397 in to HBMEC using Dharmafect 1, and cells were either infected or RNA was collected 48 hrs post  
398 transfection.

399 V5 -fused BPIFB3 was generated by cloning into pcDNA3.1/V5-His TOPO TA according  
400 to the manufacturer's protocol. Development of GFP tagged RETREG1 and RETREG1mutLIR  
401 have been described elsewhere(22). RETERG1 GFP1-10 and BPIFB3 GFP11 were cloned into  
402 pcDNA3.1-GFP(1-10) or pEGFP-GFP11 respectively, using plasmids provided by Seema  
403 Lakdawala (University of Pittsburgh). RFP tagged LC3 cloning has been described previously(46).  
404 Plasmids were reverse transfected into U2OS cells using either X-tremeGENE 9 or X-tremeGENE  
405 HP according to the manufacturers protocol and fixed for fluorescence microscopy or infected at  
406 48 hrs post transfection.

407

#### 408 **RNA extraction, cDNA synthesis, and RT-qPCR**

409 RNA was isolated using the GenElute Total RNA MiniPrep kit from Sigma according to the kit  
410 protocol. RNA was reverse transcribed using the iScript cDNA Synthesis kit (Bio-Rad) with 1 $\mu$ g  
411 of RNA per sample. RT-qPCR was performed using IQ SYBR green SuperMix (Bio-Rad) in a Bio-  
412 Rad CFX96 Touch real-time PCR detection system. A modified threshold cycle ( $\Delta$ CT) method  
413 was used to calculate gene expression using human actin for normalization. Primer sequences  
414 for actin, DENV, ZIKV, CVB, BPIFB3, and RETREG1 have been described previously(22,46).

415

#### 416 **RNAseq**

417 Total RNA was isolated as described above, and RNAseq was performed as previously  
418 described(25). Analysis of RNAseq data sets was performed using CLC Genomics 11 (Qiagen)  
419 to process and map sequences to the human genome (hg19) or the appropriate viral genome to  
420 calculate viral fragments per kilobase of transcript per million mapped reads (FPKM) values.  
421 Differentially expressed genes were identified using the DeSeq2 package in R with a significance  
422 cutoff of 0.001 and a fold change cutoff of two(47). Gene set enrichment analysis (GSEA) and  
423 manual sorting were used to identify pathways or specific transcripts differentially regulated.  
424 Generation of heat maps was done using MeViewer software based on  $\ln$ (RPKM) values.

425

## 426 **Antibodies**

427 Mouse monoclonal anti-V5 epitope tag was purchased from Invitrogen (R960-25). Rabbit  
428 polyclonal antibodies against CKAP4 (16686-1-AP), RTN4 (10950-1-AP), and FAM134B (21537-  
429 1- AP) were purchased from ProteinTech. Rabbit polyclonal antibodies to DENV NS3  
430 (GTX124252) and ZIKV NS4B (GTX133311) were purchased from GeneTex. Recombinant  
431 mouse monoclonal anti-dsRNA was provided by Abraham Brass (University of Massachusetts).  
432 Alexa Fluor conjugated secondary antibodies were purchased from Invitrogen.

433

## 434 **Immunofluorescence and electron microscopy**

435 Immunofluorescence microscopy was performed on cells grown in 8-well chamber slides  
436 (company?), fixed in 4% paraformaldehyde, and permeabilized with 0.1% Triton. In some cases,  
437 cells were fixed in ice cold methanol. Primary antibodies were incubated in PBS with cells for 1  
438 hr, followed by staining with Alexa Fluor conjugated secondary antibodies for 30 min. Slides were  
439 mounted with coverslips using VectaShield containing 40-6-diamino-2-phenylindole (DAPI).  
440 Imaging was performed on an Olympus IX83 inverted microscope. All image quantification was  
441 performed using ImageJ/FIJI. Pixel intensity measurements were performed using isolated  
442 channels on individual cells with the region of interest (ROI) manager. Data are presented as  
443 mean pixel intensity, normalized to cell area. Quantification of fluorescent puncta was performed  
444 manually, counting the number ER localized vesicles alone, or co-localized with the indicated  
445 marker. Preparation of samples for TEM were done as previously described, by the Center for  
446 Biologic Imaging (University of Pittsburgh)(46). Imaging was performed on a JEOL 1011  
447 transmission electron microscope. Quantification of TEM images was performed manually.

448

## 449 **Statistical analyses**

450 All analyses were performed using GraphPad Prism. Experiments were performed at least three

451 times. Student's t test, 2way analysis of variance (ANOVA), or one-way ANOVA were used where  
452 indicated. Analysis of fluorescent microscopy data was done using a non-parametric Kruskal-  
453 Wallis test. Data are presented as mean  $\pm$  standard deviation, with specific p-values detailed in  
454 the figure legends.

455

## 456 **Acknowledgements**

457 We thank Abraham Brass (University of Massachusetts) for providing anti-dsRNA antibody,  
458 Theodore Pierson (NIH/NIAD) for providing the providing DENV replicon constructs, and Seema  
459 Lakdawala (University of Pittsburgh) for providing Split GFP constructs. This project was  
460 supported by NIH R01-AI081759 [C.B.C.]. In addition, C.B.C. is supported by a Burroughs  
461 Wellcome Investigators in the Pathogenesis of Infectious Disease Award.

462

## 463 **References**

- 464 1. Welsch S, Miller S, Romero-Brey I, Merz A, Bleck CKE, Walther P, et al. Composition  
465 and Three-Dimensional Architecture of the Dengue Virus Replication and Assembly  
466 Sites. *Cell Host Microbe*. 2009;5(4):365–75. Doi: 10.1016/j.chom.2009.03.007
- 467 2. Cortese M, Goellner S, Acosta EG, Neufeldt CJ, Oleksiuk O, Lampe M, et al.  
468 Ultrastructural Characterization of Zika Virus Replication Factories. *Cell Rep*.  
469 2017;18(9):2113–23.
- 470 3. Kaufusi PH, Kelley JF, Yanagihara R, Nerurkar VR. Induction of endoplasmic reticulum-  
471 derived replication-competent membrane structures by West Nile virus non-structural  
472 protein 4B. *PLoS One*. 2014;9(1).
- 473 4. Miller S, Kastner S, Krijnse-Locker J, Bühler S, Bartenschlager R. The non-structural  
474 protein 4A of dengue virus is an integral membrane protein inducing membrane  
475 alterations in a 2K-regulated manner. *J Biol Chem*. 2007;282(12):8873–82.
- 476 5. Peña J, Harris E. Early dengue virus protein synthesis induces extensive rearrangement

- 477 of the endoplasmic reticulum independent of the UPR and SREBP-2 pathway. PLoS One.  
478 2012;7(6):1–15.
- 479 6. Gillespie LK, Hoenen A, Morgan G, Mackenzie JM. The Endoplasmic Reticulum Provides  
480 the Membrane Platform for Biogenesis of the Flavivirus Replication Complex. J Virol.  
481 2010;84(20):10438–47. Doi: 10.1128/JVI.00986-10.
- 482 7. Paul D, Bartenschlager R. Flaviviridae Replication Organelles: Oh, What a Tangled Web  
483 We Weave. Annu Rev Virol. 2015;2(1):289–310. Doi: 10.1146/annurev-virology-100114-  
484 055007.
- 485 8. Neufeldt CJ, Cortese M, Acosta EG, Bartenschlager R. Rewiring cellular networks by  
486 members of the Flaviviridae family. Nat Rev Microbiol. 2018;16(3):125–42. Doi:  
487 10.1038/nrmicro.2017.170.
- 488 9. Shibata Y, Shemesh T, Prinz WA, Palazzo AF, Kozlov MM, Rapoport TA. Mechanisms  
489 determining the morphology of the peripheral ER. Cell. 2010;143(5):774–88. Doi.  
490 10.1016/j.cell.2010.11.007.
- 491 10. Lin S, Sun S, Hu J. Molecular basis for sculpting the endoplasmic reticulum membrane.  
492 Int J Biochem Cell Biol. 2012;44(9):1436–43. DOI: 10.1016/j.biocel.2012.05.013.
- 493 11. Lennemann NJ, Coyne CB. Catch Me If You Can: The Link between Autophagy and  
494 Viruses. PLoS Pathog. 2015;11(3):1–6.
- 495 12. Bento CF, Renna M, Ghislat G, Puri C, Ashkenazi A, Vicinanza M, et al. Mammalian  
496 Autophagy: How Does It Work? Annu Rev Biochem. 2016;85(1):685–713. Doi:  
497 10.1146/annurev-biochem-060815-014556.
- 498 13. Khaminets A, Heinrich T, Mari M, Grumati P, Huebner AK, Akutsu M, et al. Regulation of  
499 endoplasmic reticulum turnover by selective autophagy. Nature. 2015;522(7556):354–8.  
500 Doi: 10.1038/nature14498.
- 501 14. Kirkegaard K. Subversion of the cellular autophagy pathway by viruses. Current Topics in  
502 Microbiology and Immunology. 2009.

- 503 15. Levine B, Mizushima N, Virgin HW. Autophagy in immunity and inflammation. *Nature*.  
504 2011;469(7330):323–35. Doi: 10.1038/nature09782.
- 505 16. Deretic V, Saitoh T, Akira S. Autophagy in infection, inflammation and immunity. *Nat Rev*  
506 *Immunol*. 2013;13(10):722–37. Doi: 10.1038/nri3532.
- 507 17. Moretti J, Roy S, Bozec D, Martinez J, Chapman JR, Ueberheide B, et al. STING Senses  
508 Microbial Viability to Orchestrate Stress-Mediated Autophagy of the Endoplasmic  
509 Reticulum. *Cell*. 2017;171(4):809–823.e13. Doi: 10.1016/j.cell.2017.09.034.
- 510 18. Metz P, Chiramel A, Chatel-Chaix L, Alvisi G, Bankhead P, Mora-Rodríguez R, et al.  
511 Dengue Virus Inhibition of Autophagic Flux and Dependency of Viral Replication on  
512 Proteasomal Degradation of the Autophagy Receptor p62. *J Virol*. 2015;89(15):8026–41.  
513 Doi: 10.1128/JVI.00787-15.
- 514 19. Liang Q, Luo Z, Zeng J, Chen W, Foo SS, Lee SA, et al. Zika Virus NS4A and NS4B  
515 Proteins Deregulate Akt-mTOR Signaling in Human Fetal Neural Stem Cells to Inhibit  
516 Neurogenesis and Induce Autophagy. *Cell Stem Cell*. 2016;19(5):663–71. Doi:  
517 10.1016/j.stem.2016.07.019.
- 518 20. Heaton NS, Perera R, Berger KL, Khadka S, LaCount DJ, Kuhn RJ, et al. Dengue virus  
519 nonstructural protein 3 redistributes fatty acid synthase to sites of viral replication and  
520 increases cellular fatty acid synthesis. *Proc Natl Acad Sci*. 2010;107(40):17345–50. Doi:  
521 10.1073/pnas.1010811107.
- 522 21. Jordan TX, Randall G. Dengue Virus Activates the AMP Kinase-mTOR Axis To Stimulate  
523 a Proviral Lipophagy. *J Virol*. 2017;91(11):e02020-16. Doi: 10.1128/JVI.02020-16.
- 524 22. Lennemann NJ, Coyne CB. Dengue and Zika viruses subvert reticulophagy by NS2B3-  
525 mediated cleavage of FAM134B. *Autophagy*. 2017;13(2):322–32. Doi:  
526 10.1080/15548627.2016.1265192.
- 527 23. Delorme-Axford E, Morosky S, Bomberger J, Stolz DB, Jackson WT, Coyne CB. BPIFB3  
528 regulates autophagy and coxsackievirus B replication through a noncanonical pathway



- 529 independent of the core initiation machinery. *MBio*. 2014;5(6):e02147.
- 530 24. Bramley JC, Drummond CG, Lennemann NJ, Good CA, Kim KS, Coyne CB. A Three-  
531 Dime1. Bramley JC, Drummond CG, Lennemann NJ, Good CA, Kim KS, Coyne CB. A  
532 Three-Dimensional Cell Culture System To Model RNA Virus Infections at the Blood-  
533 Brain Barrier. *mSphere*. 2017;2(3):e00206-17. doi:10.1128/mSphere.00206-17.
- 534 25. Bayer A, Lennemann NJ, Ouyang Y, Bramley JC, Morosky S, Marques ETDA, et al. Type  
535 III Interferons Produced by Human Placental Trophoblasts Confer Protection against Zika  
536 Virus Infection. *Cell Host Microbe*. 2016;19(5):705–12. Doi: 10.1016/j.chom.2016.03.008.
- 537 26. Morosky S, Lennemann NJ, Coyne CB. BPIFB6 Regulates Secretory Pathway Trafficking  
538 and Enterovirus Replication. 2016;90(10):5098–107.
- 539 27. Kamiyama D, Sekine S, Barsi-Rhyne B, Hu J, Chen B, Gilbert LA, et al. Versatile protein  
540 tagging in cells with split fluorescent protein. *Nat Commun*. 2016;7:11046.
- 541 28. Kerppola TK. Bimolecular fluorescence complementation (BiFC) analysis as a probe of  
542 protein interactions in living cells. *Annu Rev Biophys*. 2008;37:465–87.
- 543 29. Yu C-Y, Hsu Y-W, Liao C-L, Lin Y-L. Flavivirus Infection Activates the XBP1 Pathway of  
544 the Unfolded Protein Response To Cope with Endoplasmic Reticulum Stress. *J Virol*.  
545 2006;80(23):11868–80. Doi: 10.1128/JVI.00879-06.
- 546 30. Datan E, Roy SG, Germain G, Zali N, McLean JE, Golshan G, et al. Dengue-induced  
547 autophagy, virus replication and protection from cell death require ER stress (PERK)  
548 pathway activation. *Cell Death Dis*. 2016;7(3):e2127.
- 549 31. Aktepe TE, Liebscher S, Prier JE, Simmons CP, Mackenzie JM. The Host Protein  
550 Reticulon 3.1A Is Utilized by Flaviviruses to Facilitate Membrane Remodelling. *Cell Rep*.  
551 2017;21(6):1639–54. Doi: 10.1016/j.celrep.2017.10.055.
- 552 32. Grumati P, Morozzi G, Hölper S, Mari M, Harwardt M-LI, Yan R, et al. Full length RTN3  
553 regulates turnover of tubular endoplasmic reticulum via selective autophagy. *Elife*.  
554 2017;6:e25555. Doi: 10.7554/eLife.25555.

- 555 33. Fumagalli F, Noack J, Bergmann TJ, Presmanes EC, Pisoni GB, Fasana E, et al.  
556 Translocon component Sec62 acts in endoplasmic reticulum turnover during stress  
557 recovery. *Nat Cell Biol.* 2016;18(11):1173–84.
- 558 34. Wong J, Zhang J, Si X, Gao G, Mao I, McManus BM, et al. Autophagosome Supports  
559 Coxsackievirus B3 Replication in Host Cells. *J Virol.* 2008;82(18):9143–53. Doi:  
560 10.1128/JVI.00641-08.
- 561 35. Harris KG, Morosky SA, Drummond CG, Patel M, Kim C, Stolz DB, et al. RIP3 regulates  
562 autophagy and promotes coxsackievirus B3 infection of intestinal epithelial cells. *Cell*  
563 *Host Microbe.* 2015;18(2):221–32. Doi: 10.1016/j.chom.2015.07.007.
- 564 36. Wu H, Zhai X, Chen Y, Wang R, Lin L, Chen S, et al. Protein 2B of coxsackievirus B3  
565 induces autophagy relying on its transmembrane hydrophobic sequences. *Viruses.*  
566 2016;8(5):1–11.
- 567 37. Mateo R, Nagamine CM, Spagnolo J, Mendez E, Rahe M, Gale M, et al. Inhibition of  
568 Cellular Autophagy Deranges Dengue Virion Maturation. *J Virol.* 2013;87(3):1312–21.  
569 Doi: doi/10.1128/JVI.02177-12.
- 570 38. Bingle CD, Craven CJ. PLUNC: a novel family of candidate host defence proteins  
571 expressed in the upper airways and nasopharynx. *Hum Mol Genet.* 2002;11(8):937–43.
- 572 39. Bingle CD, LeClair EE, Havard S, Bingle L, Gillingham P, Craven CJ. Phylogenetic and  
573 evolutionary analysis of the PLUNC gene family. *Protein Sci.* 2004;13(2):422–30.
- 574 40. Bingle CD, Seal RL, Craven CJ. Systematic nomenclature for the  
575 PLUNC/PSP/BSP30/SMGB proteins as a subfamily of the BPI fold-containing  
576 superfamily. *Biochem Soc Trans.* 2011;39(4):977–83.
- 577 41. Wang S, Tukachinsky H, Romano FB, Rapoport TA. Cooperation of the ER-shaping  
578 proteins atlastin, lunapark, and reticulons to generate a tubular membrane network. *Elife.*  
579 2016;5(September):1–29.
- 580 42. Fang YT, Wan SW, Lu YT, Yao JH, Lin CF, Hsu LJ, et al. Autophagy facilitates antibody-

- 581 enhanced dengue virus infection in human pre-basophil/mast cells. PLoS One.  
582 2014;9(10):1–10.
- 583 43. Medina F, Medina JF, Colon C, Vergne E, Santiago GA, Munoz-Jordan JL. Dengue virus:  
584 Isolation, propagation, quantification, and storage. *Curr Protoc Microbiol.*  
585 2012;(SUPPL.27):1–24.
- 586 44. Payne AF, Binduga-Gajewska I, Kauffman EB, Kramer LD. Quantitation of flaviviruses by  
587 fluorescent focus assay. *J Virol Methods.* 2006;134(1–2):183–9.
- 588 45. Coyne CB, Bergelson JM. Virus-induced Abl and Fyn kinase signals permit  
589 coxsackievirus entry through epithelial tight junctions. *Cell.* 2006;124(1):119–31.
- 590 46. Delorme-Axford E, Donker RB, Mouillet J-F, Chu T, Bayer A, Ouyang Y, et al. Human  
591 placental trophoblasts confer viral resistance to recipient cells. *Proc Natl Acad Sci.*  
592 2013;110(29):12048–53. Doi: 10.1073/pnas.1304718110.
- 593 47. Love MI, Huber W, Anders S. Moderated estimation of fold change and dispersion for  
594 RNA-seq data with DESeq2. *Genome Biol.* 2014;15(12):550. Doi: 10.1186/s13059-014-  
595 0550-8.

596

597 **Figures**

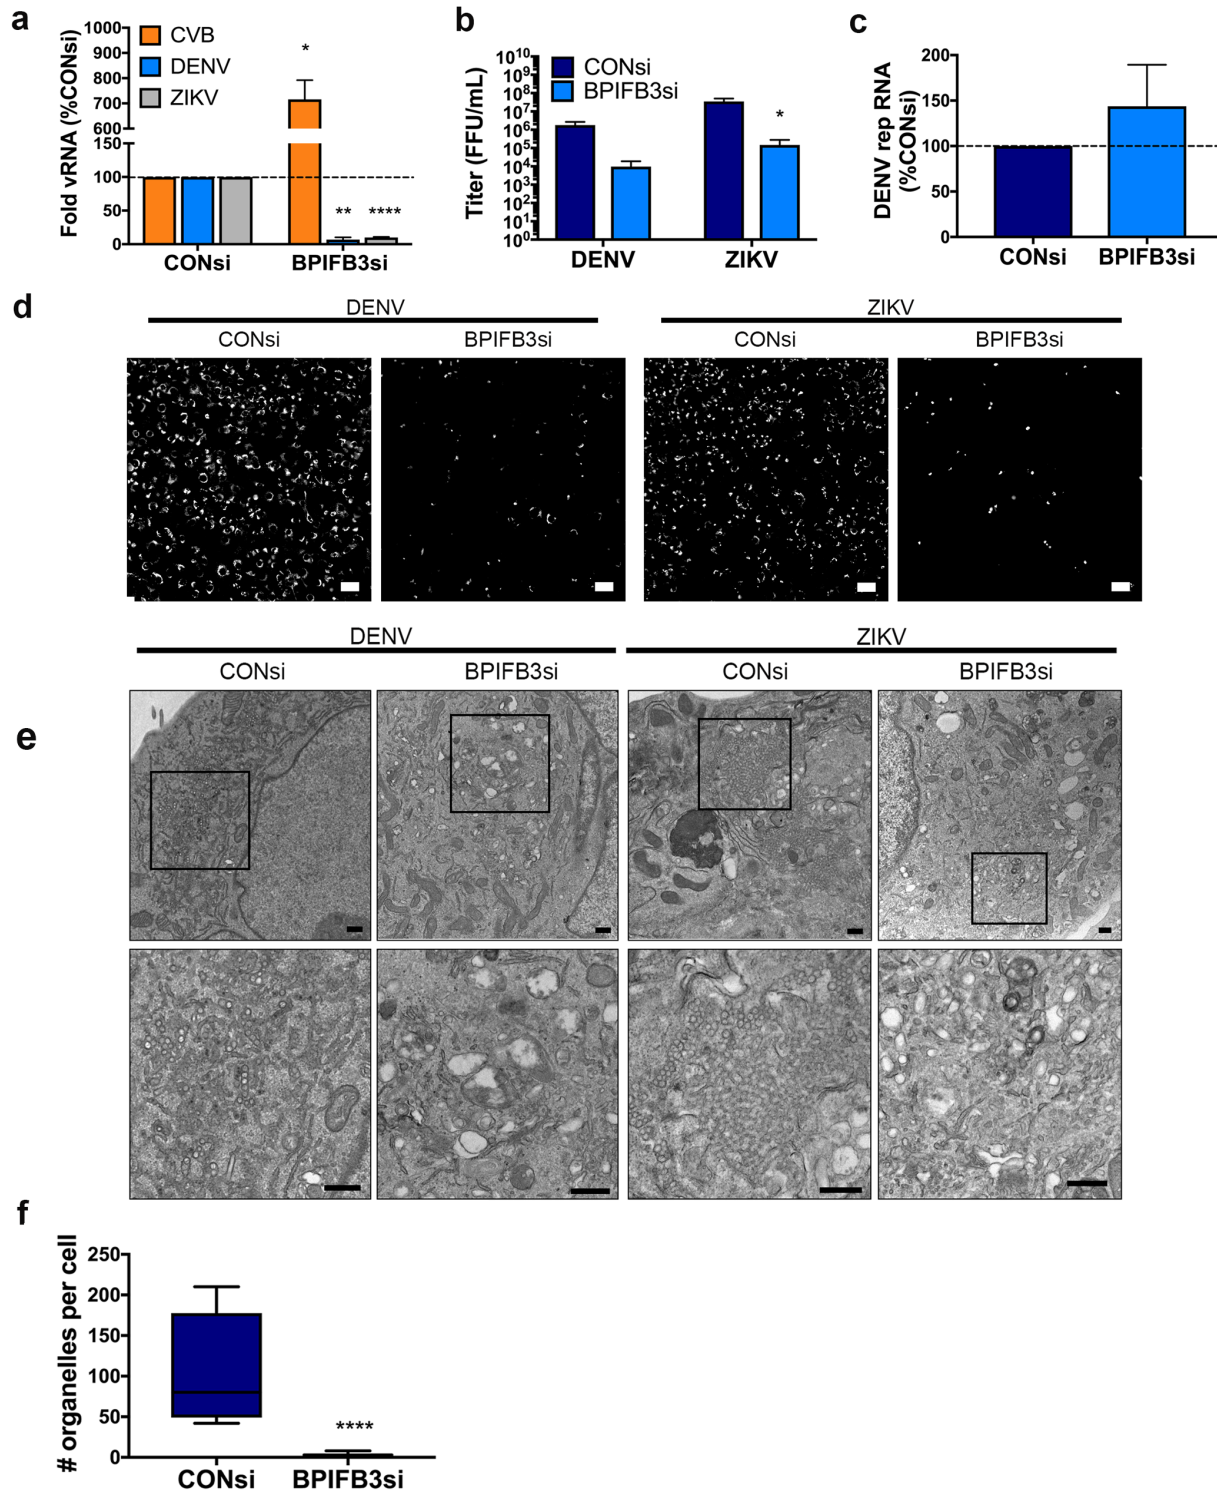

598

599 **Figure 1. BPIFB3 depletion restricts an early step in flavivirus infection. (a)** Infection levels

600 of CVB, DENV, and ZIKV determined by RT-qPCR. Data are presented as a percent change from

601 CONsi-transfected cells. **(b)** Titration (by fluorescence focus unit assay) of DENV and ZIKV

602 infectious particle production from HBMEC from panel (a). (c) DENV replicon RNA levels as  
603 determined by RT-qPCR in response to BPIFB3 depletion, presented as percent of CONsi. (d)  
604 Immunofluorescence microscopy for dsRNA (green), a replication intermediate, in CONsi or  
605 BPIFB3si transfected HBMEC. Scale bar is 50  $\mu\text{m}$ . (e) TEM from HBMEC transfected with CONsi  
606 or BPIFB3si and infected with DENV or ZIKV. Top panel scale bar is 2  $\mu\text{m}$  and bottom panel scale  
607 bar is 500 nm. (f) Quantification of the number of ZIKV replication organelles per cell in TEM  
608 images (panel e). Students t test were performed to determine statistical significance (\* $< 0.05$ , \*\*  
609  $< 0.01$ , \*\*\*  $< 0.001$ , \*\*\*\*  $< 0.0001$ ).

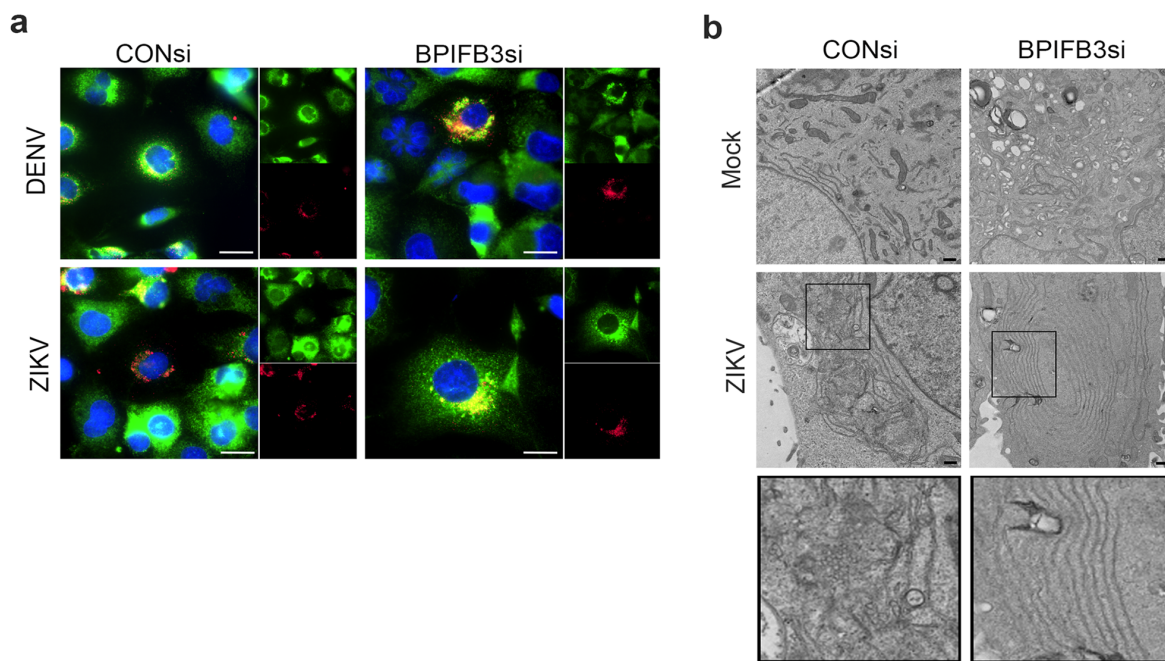

610  
611 **Figure 2. BPIFB3 depletion induces aberrant ER structures during flavivirus infection. (a)**  
612 Immunofluorescence microscopy from CONsi or BPIFB3si transfected HBMEC infected with DENV  
613 or ZIKV (MOI=1) and stained for dsRNA (red) and Climp63 (green) 48hrs post-infection. Scale  
614 bars are 20  $\mu\text{m}$ . (b) TEM images from CONsi or BPIFB3si transfected HBMEC infection with ZIKV  
615 (or mock infected controls). Scale bars are 2  $\mu\text{m}$ .  
616



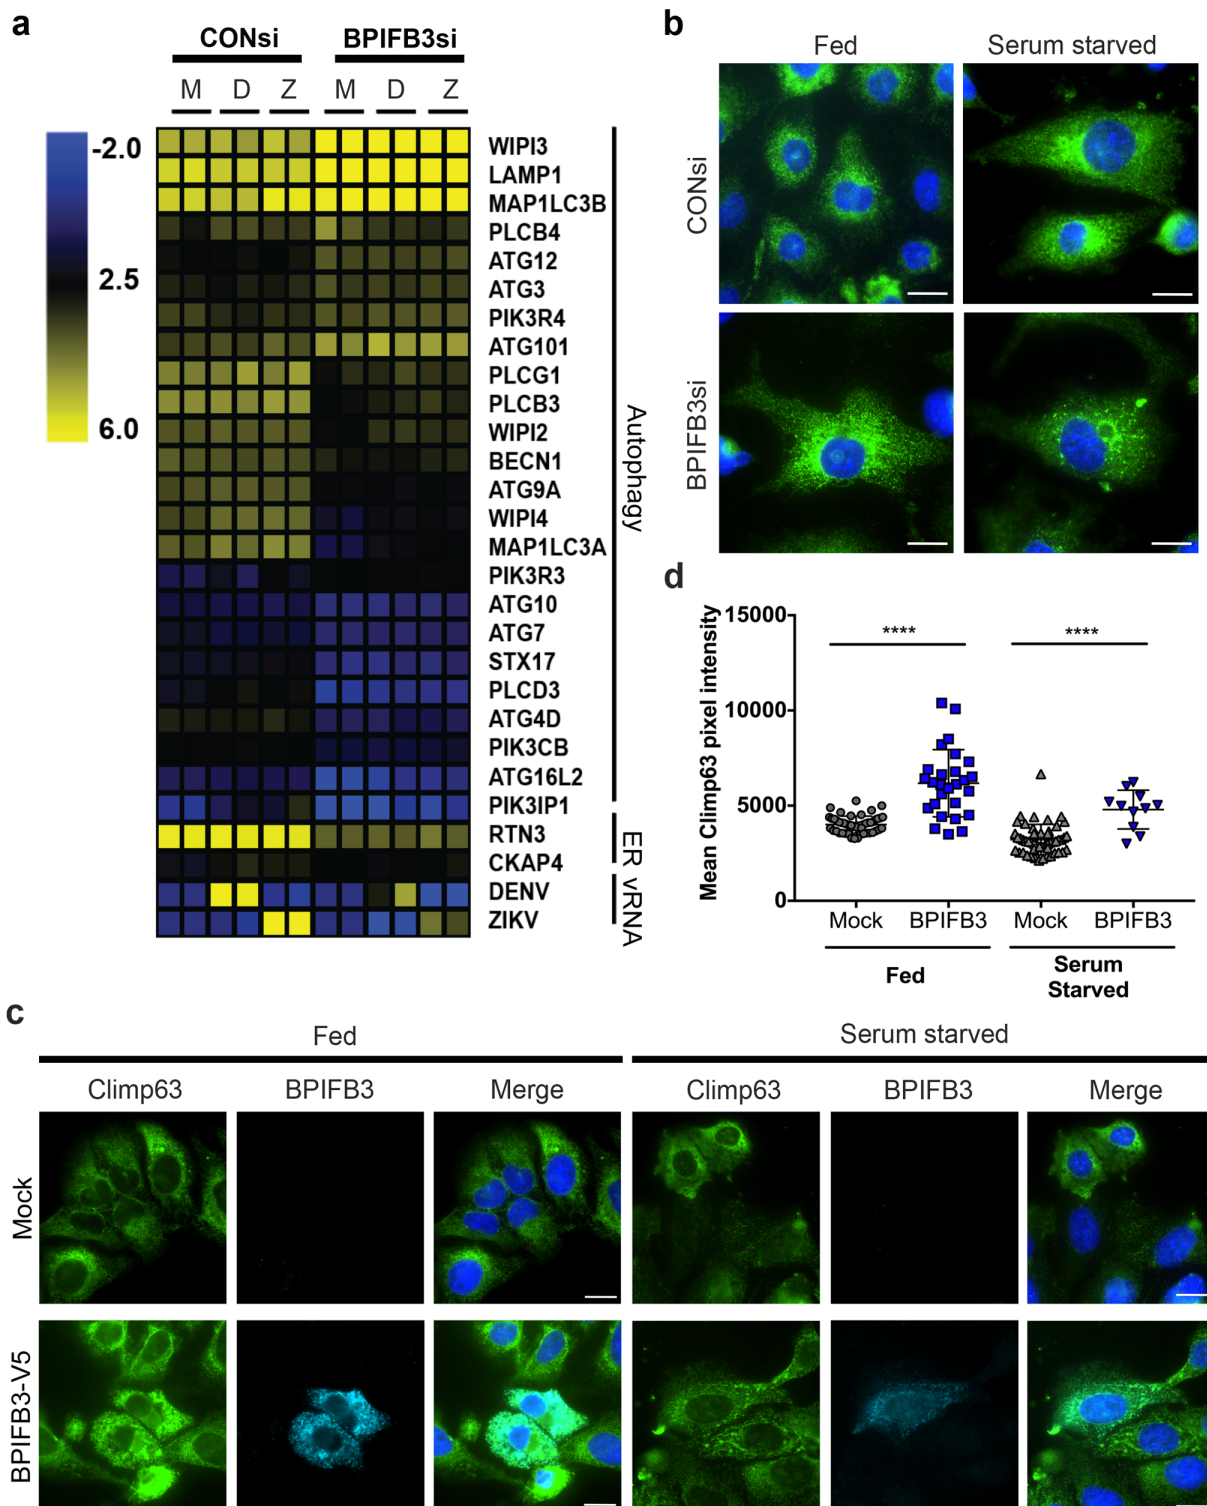

617

618 **Figure 3. BPIFB3 controls ER turnover through an autophagy-associated pathway. (a)**

619 Heatmap of  $\log_2(\text{RPKM})$  values as determined by RNASeq from mock (M), DENV (D), or ZIKV

620 (Z)-infected CONsi and BPIFB3si transfected HBMEC. **(b)** Climp63 (green) ER morphology of  
621 CONsi and BPIFB3si HBMECs under fed and serum starved conditions. **(c)** U2OS cells  
622 expressing BPIFB3-V5 or Mock transfected were either fed or serum starved and stained for  
623 Climp63 (green) and V5 (teal). **(d)** Quantification of Climp63 pixel intensity from panel c shows  
624 BPIFB3 expression corresponds to increased levels of the ER sheet marker. All scale bars are  
625 20  $\mu\text{m}$ . A non-parametric Kruskal-Wallis test was performed to determine significance of IF pixel  
626 quantification (\*\*\*\*  $< 0.0001$ ).

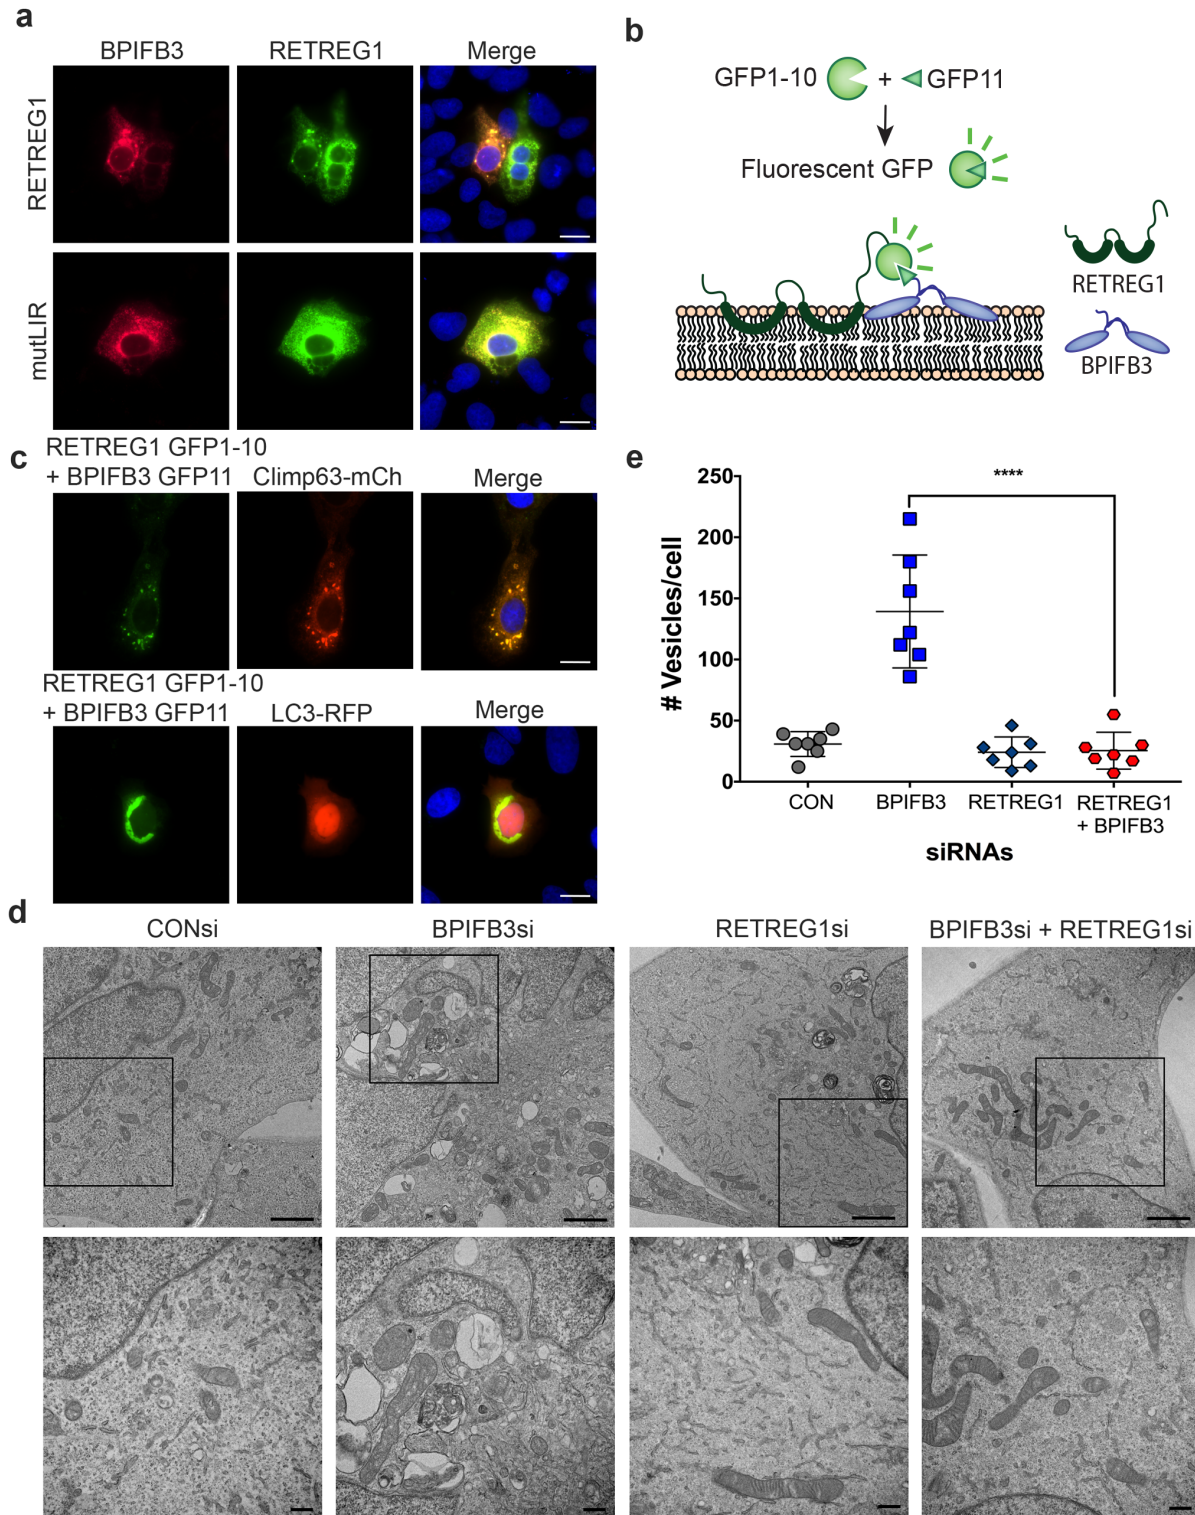

627

628 **Figure 4. BPIFB3 and RETREG1 co-localize to ER sheets.** (a) U2OS cells transfected with

629 BPIFB3-V5 and RETREG1-GFP or RETREG1 mutLIR GFP. (b) Schematic of modified BiFC



630 assay using split GFP. **(c)** Split GFP assay, RETREG1 GFP1-10 and BPIFB3 GFP11 were co-  
631 expressed with Climp63-mCherry or LC3-RFP. Green fluorescence indicates RETREG1 and  
632 BPIFB3 are in close enough proximity to interact. Immunofluorescence scale bars are 20  $\mu\text{m}$ . **(d)**  
633 TEM of HBMEC depleted of BPIFB3 and RETREG1 alone or together. Top panel shows total cell  
634 morphology, scale bars represent 2  $\mu\text{m}$ . Black boxes indicated regions magnified in bottom panel  
635 to show ER membrane and vesicle morphology. Lower panel scale bars are 500 nm. **(e)**  
636 Quantification of total cytoplasmic vesicles from seven cells in each knockdown condition. A One-  
637 way ANOVA was performed to determine significance (\*\*\*\* < 0.0001).

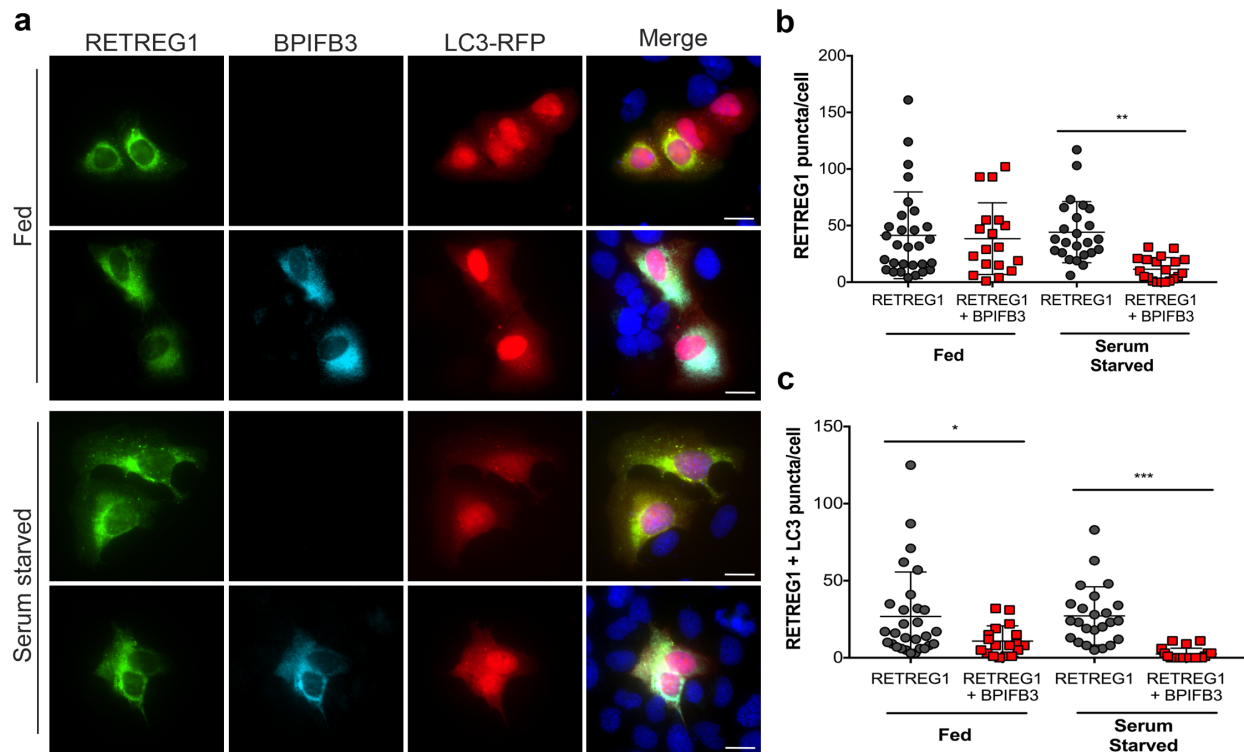

638

639 **Figure 5. BPIFB3 inhibits RETREG1 reticulophagy in response to nutrient deprivation. (a)**  
640 U2OS cells co-expressing RETREG1-GFP and LC3-RFP were co-transfected with or without  
641 BPIFB3-V5 and kept under fed or serum starved conditions. **(b)** Total RETREG1 puncta were  
642 quantified under each condition as indicated. **(c)** Quantification of the number of RETREG1 and  
643 LC3 positive positive puncta under either nutrient rich (fed) or nutrient deprived (serum starved)

644 conditions. A One-way ANOVA with Bonferroni correction was performed to determine  
 645 significance (\* < 0.05, \*\* < 0.01, \*\*\* < 0.001).

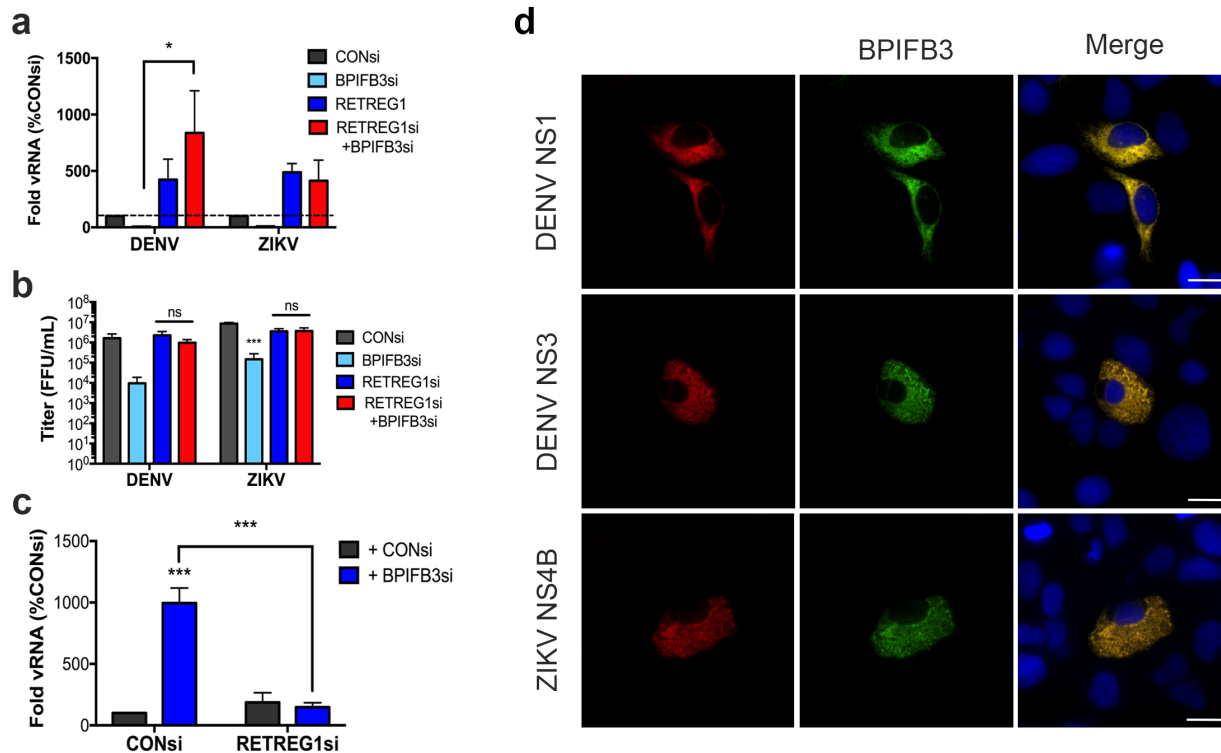

646

647 **Figure 6. BPIFB3 regulates RETREG1 specific reticulophagy during flavivirus infection. (a)**

648 RT-qPCR for DENV and ZIKV infection levels in cells depleted of BPIFB3 and RETREG1 alone

649 or together. **(b)** Infectious particle production from BPIFB3 and RETREG1 depleted cells as

650 determined by fluorescence focus unit (FFU) assays. **(c)** Cells depleted of BPIFB3 and RETREG1

651 were infected with CVB at a MOI of 1 and analyzed for level of infection by RT-qPCR. Statistical

652 significance was determined by 2-way ANOVA for each panel (\* < 0.05, \*\*\* < 0.001). **(d)** U2OS

653 cells overexpressing DC-SIGN to enhance infection were transfected with BPIFB3-V5 (green)

654 and then infected with DENV or ZIKV. Cells were fixed and stained 48hrs following infection and

655 immunostained for the indicated viral proteins (in red).
